# Supplementary material
Source: PubMed Central journal article supplement (PMC5990040)
Supplement: NIHMS968182-supplement-Supplemental.pdf [file NIHMS968182-supplement-Supplemental.pdf]

## Supporting Information Cover Sheet

Manuscript Title: Flexible macromolecule versus rigid particle retention in the injected skin and accumulation in draining lymph nodes are differentially influenced by hydrodynamic size

Authors: Nathan Andrew Rohner and Susan Napier Thomas

Pages: 1

Figures: 1

Tables: 0

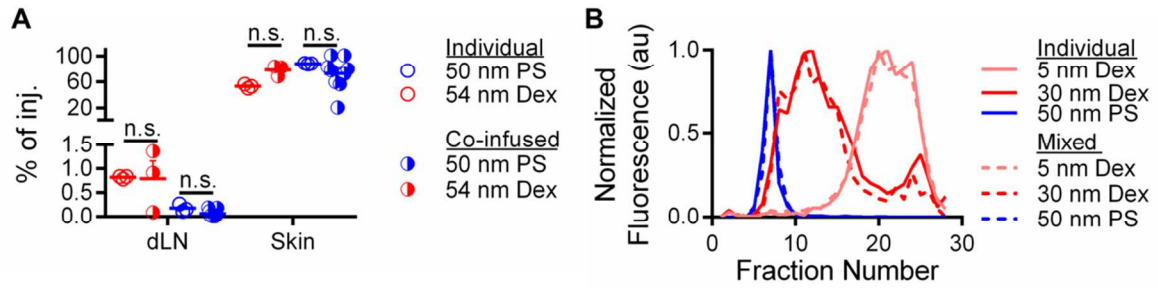

**Figure S1.** Characterization of individual versus mixtures of fluorescent tracers. **(A)** Measured dLN accumulation and dermal retention of dextran (Dex) and polystyrene spheres (PS) either individually infused into the dorsal skin of separate animals or with tracers mixed together and co-infused into the dorsal skin. **(B)** Comparison of individual and mixed tracer elution profiles after separation on a CL-6B column (Sigma-Aldrich).
